# Supplementary material
Source: PubMed Central journal article supplement (PMC7495717)
Supplement: ao0c02991_si_001.pdf [file ao0c02991_si_001.pdf]

---

**The circRNA circRIMS acts as a microRNA sponge to promote gastric cancer metastasis**

**Running title: circRIMS promotes gastric cancer metastasis**

Jun Lin<sup>1,2</sup>, Yi Zhang<sup>1</sup>, Xianchang Zeng<sup>1</sup>, Chaorong Xue<sup>1</sup>, Xu Lin<sup>1,3\*</sup>

<sup>1</sup> Key Laboratory of Gastrointestinal Cancer (Fujian Medical University), Ministry of Education, Fuzhou, China

<sup>2</sup> College of Biological Science and Engineering, Fuzhou University, No.2 Xueyuan Road, Fuzhou 350108, China.

<sup>3</sup> Fujian Key Laboratory of Tumor Microbiology, Fujian Medical University, No.1 Xuefu North Road, Fuzhou 350122, China

**\*Corresponding author:** Prof. Xu Lin, Key Laboratory of Gastrointestinal Cancer (Fujian Medical University), Ministry of Education, School of Basic Medical Sciences, 1 Xue Fu North Road, Fuzhou, Fujian 350122, China. Phone: +86-591-22862648; Fax: +86-591-83569132; E-mail: [linxu@mail.fjmu.edu.cn](mailto:linxu@mail.fjmu.edu.cn)

---

5' AACAGAAAAATATAACTCTTCCACAAAAGTTTAAAGAGCCCATGAAT  
GTAGTTTGGGGGCATCGAAATAATGATATAAGAAGATCAAACTGAACCA  
GAAATTAATGACTTCAAGAAGCTTAGTAGTGGAGGAGCGAACAAGACA  
GATGAAAATGAAAGTGCATCGATTTAAGCAGACAACAGGGTCTGGTTCTA  
GTCAAGAACTTGATCGCGAGCAATATTCCAAGATAACATACATAAAGATC  
AGTACAGAAGCTGTGATAACGTCTCTGCCAAATCATCAGATAGTGATGTC  
AGTGATGTTTCCGCCATTTCCCGAACCAGCAGTGCCTCACGCCTCAGCAGC  
ACAAGCTTTATGTCAGAGCAATCTGAGCGCCCCAGGGGTAGAATCAGTCA  
TTTACCCCCAAAATGCAAGGCAGACGGATGGGGACTTCAGGAAGATCCAT  
CATGAAGAGCACCAGTGTCAGTGGAGAGATGTACACACTGGAGCATAAT  
GACGGCAGCCAGTCAGACACAGCTGTGGGTACAGTTGGAGCAGGTGGAA  
AGAAACGGAGATCCAGCCTTAGTGCCAAAGTGGTTGCCATAGTGTCTCGA  
AGGAGTAGAAGCACATCCCAGCTTAGTCAAACAG 3'
